# Supplementary material for: Sequence determinants of specific pattern-recognition of bacterial ligands by the NAIP–NLRC4 inflammasome
Source: PubMed Central journal article supplement (PMC5938239; doi:10.1038/s41421-018-0018-1), 2018-05-08
Supplement: 41421_2018_18_MOESM1_ESM.pdf [file 41421_2018_18_MOESM1_ESM.pdf]

## **Supplementary Information**

### **Supplementary Figure legends**

**Supplementary Figure S1** Expression of transfected inflammasome components in 293T cell reconstitution assays of the oligomeric NAIP-NLRC4 inflammasome complex or NLRC4 inflammasome activation. Replicate transfection for each of the reconstitutions shown in Fig. 1c (a), Fig. 1e (b), Fig. 1g (c) and Fig. 1h (d) was subjected to anti-Myc immunoprecipitation followed by anti-Myc or anti-HA immunoprecipitation followed by anti-HA immunoblotting.

**Supplementary Figure S2** C-terminal region from WHD to LRR domain in NAIP2 is dispensable for binding to the TTSS rod proteins BsaK and EscI. Co-immunoprecipitation assays of rod proteins BsaK, EscI with NAIP2, NAIP5, NAIP2/5 chimeras indicated in Fig. 1a and NAIP2 truncation NAIP2T3 in 293T cells. Shown are immunoblots of anti-Flag immunoprecipitates (IP: Flag) and total cell lysates (Input).

**Supplementary Figure S3** Expression of transfected inflammasome components in 293T cell reconstitution assays of NLRC4 inflammasome activation. Replicate transfection for each of the reconstitutions shown in Fig. 2f was subjected to anti-Myc immunoprecipitation followed by anti-Myc or anti-HA immunoprecipitation followed by anti-HA immunoblotting.

**Supplement Figure S4** The C35 region of SF is important of flagellin induced NAIP5/NLRC4 complex formation. Co-immunoprecipitation assays of flagellins with NAIP5 with the presence of NLRC4. 293T cells were transfected by plasmid pCS2-Flag-NAIP5 with Myc-flagellin or pCS2- Flag-NLRC4 with HA-NAIP5 and

Myc-flagellin for 30 hours. Shown are immunoblots of anti-Flag immunoprecipitates (IP: Flag) and total cell lysates (Input).

**Supplementary Figure S5** Expression of transfected inflammasome components in 293T cell reconstitution assays of NLRC4 inflammasome activation. Pro-caspase-1, NLRC4 and NAIP5 proteins were tagged with an N-terminal Myc and HA epitopes respectively. replicate transfection for each of the reconstitutions shown in Fig. 4c (a) and Fig. 5f (b) was subjected to anti-Myc immunoprecipitation followed by anti-Myc or anti-HA immunoprecipitation followed by anti-HA immunoblotting.

**Supplement Figure S6** Some flagellins without NAIP5 binding ability possess the same C terminal 35 amino acids with KF. The C terminal region of KF was aligned with flagellins of *S. flexneri*, *EHEC O157:H7* and *EPEC E2438*.

Fig.S1

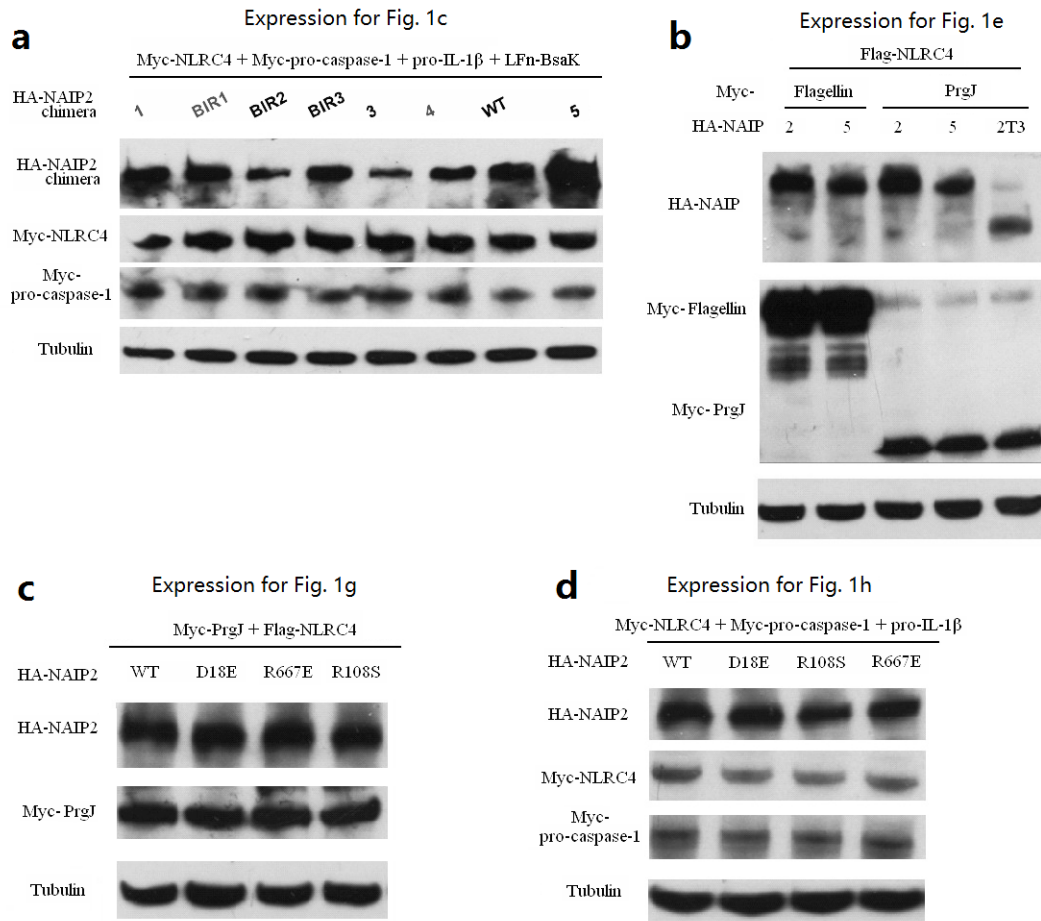

Fig.S2

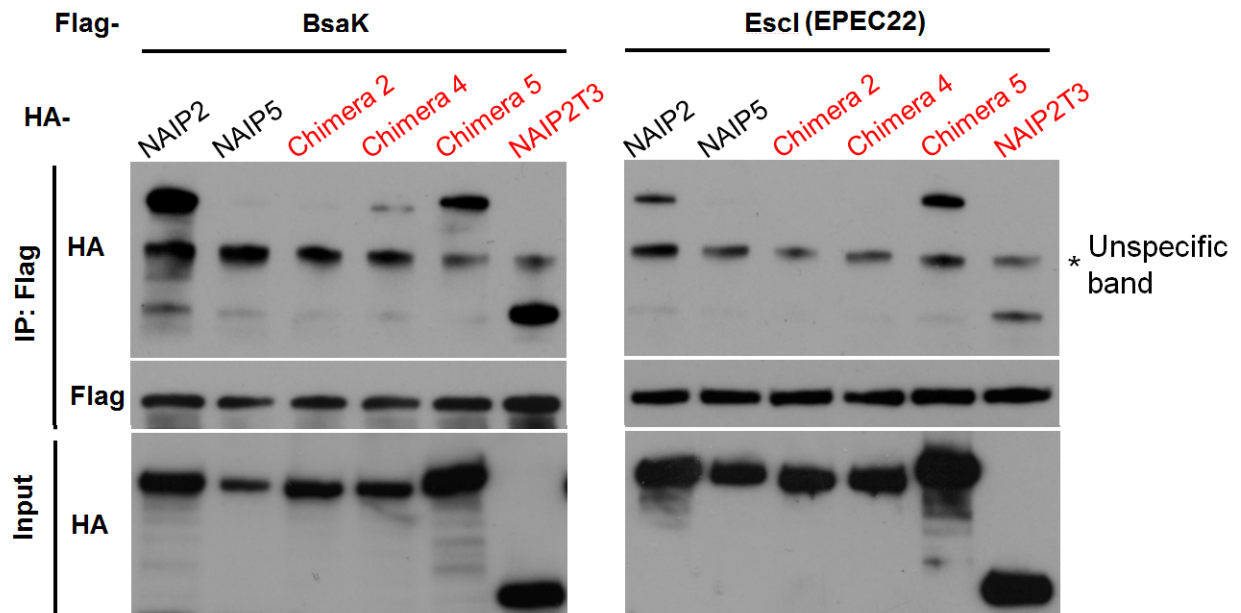

Fig. S3

Expression for Fig. 2f

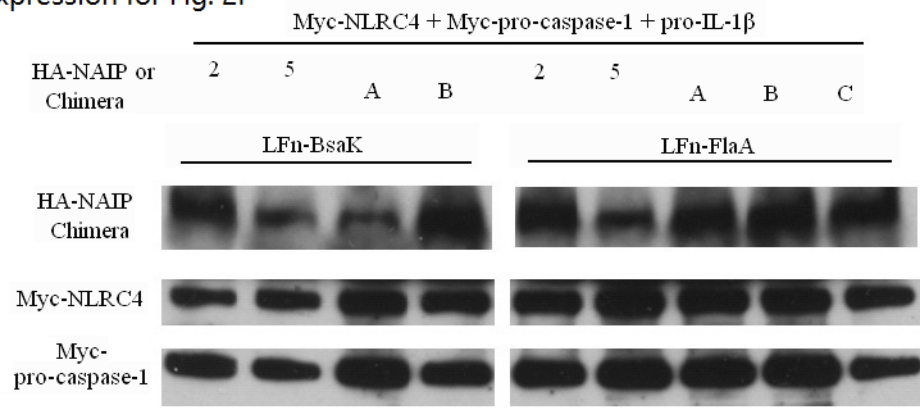

Fig. S4

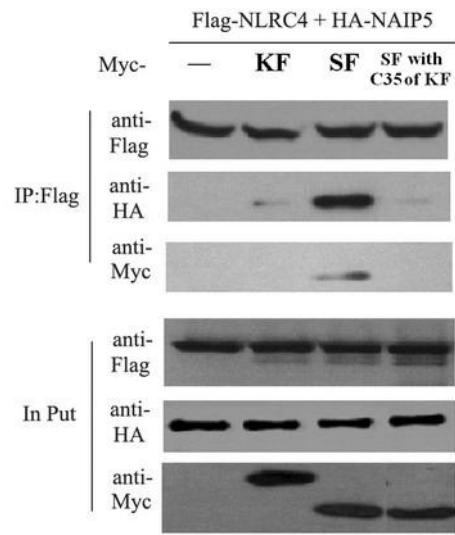

Fig.S5

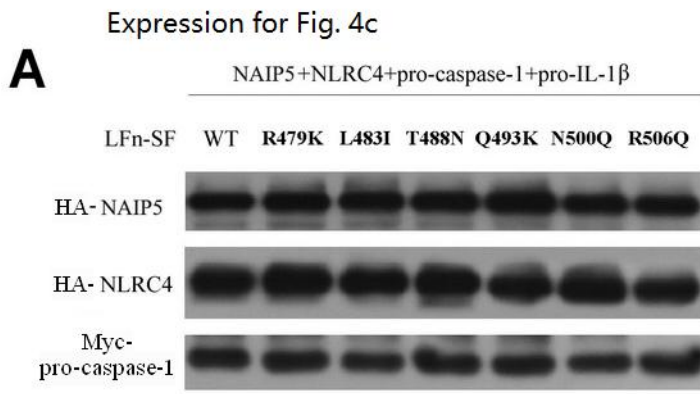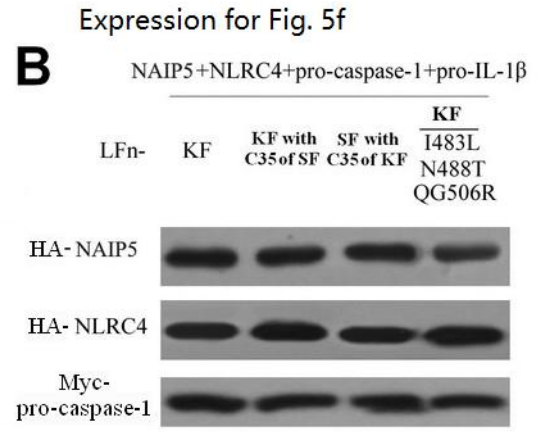

Fig. S6



Sequence alignment showing the amino acid sequence for four entries: KF, EHEC 0157, EPEC E2348, and *S. flexneri*. The sequences are highly conserved, with only minor differences in the first few residues. The alignment is shown in a black box with white text.

| Entry              | Sequence                                            |
|--------------------|-----------------------------------------------------|
| KF                 | NLSEAQSRIQDADYATEVSNMSKAQIIQQAGNSVLAKANQVPQQVLSLLQG |
| EHEC 0157          | NLSEAQSRIQDADYATEVSNMSKAQIIQQAGNSVLAKANQVPQQVLSLLQG |
| EPEC E2348         | NLSEAQSRIQDADYATEVSNMSKAQIIQQAGNSVLAKANQVPQQVLSLLQG |
| <i>S. flexneri</i> | NLSEAQSRIQDADYATEVSNMSKAQIIQQAGNSVLAKANQVPQQVLSLLQG |
